# Supplementary material for: Disaster Preparedness among Emergency Medical Service Providers: A Systematic Review Protocol
Source: Emerg Med Int. 2020 Oct 26;2020:6102940. doi: 10.1155/2020/6102940 (PMC7683168; doi:10.1155/2020/6102940)
Supplement: Supplementary Materials — Supplementary 1. File 1: selection process flow chart. Supplementary 2. File 2: PRISMA-P + checklist. [file 6102940.f1.zip]

Archive with 2 entries (2 files):
- 6102940.f1/Suplementary file 1.docx
- 6102940.f1/Suplementary matrial file2. PRISMA-P+checklist.docx
